# Supplementary material
Source: Springer Nature journal article supplement (https://www.springermedizin.de/resource/supplementary/13054_2011_9548_MOESM1_ESM.pdf/9706492)
Supplement: MOESM1 [file 9706492]

Randomized  
(n=226 )

Randomized to receive Nicardipine  
(n=110 )

Received study drug as assigned  
(n=109 )

Patient withdrew consent and lost to  
follow-up (n=1)

Analysed

- included in safety analysis (n=110)
- included in primary endpoint analysis (n=109)

Randomized to receive Labetalol  
(n=116 )

Received study drug as assigned  
(n=116 )

Patient withdrew consent and lost to  
follow-up (n=2)

Analysed

- included in safety analysis (n=116)
- included in primary endpoint analysis (n=114)
